# Supplementary material
Source: publisher site journal article supplement (https://www.dovepress.com/article/474343)
Supplement: Supplementary file 1 [file get_supplementary_file.php]

### Supplementary Material

# Supplementary Figures

## Figure S1


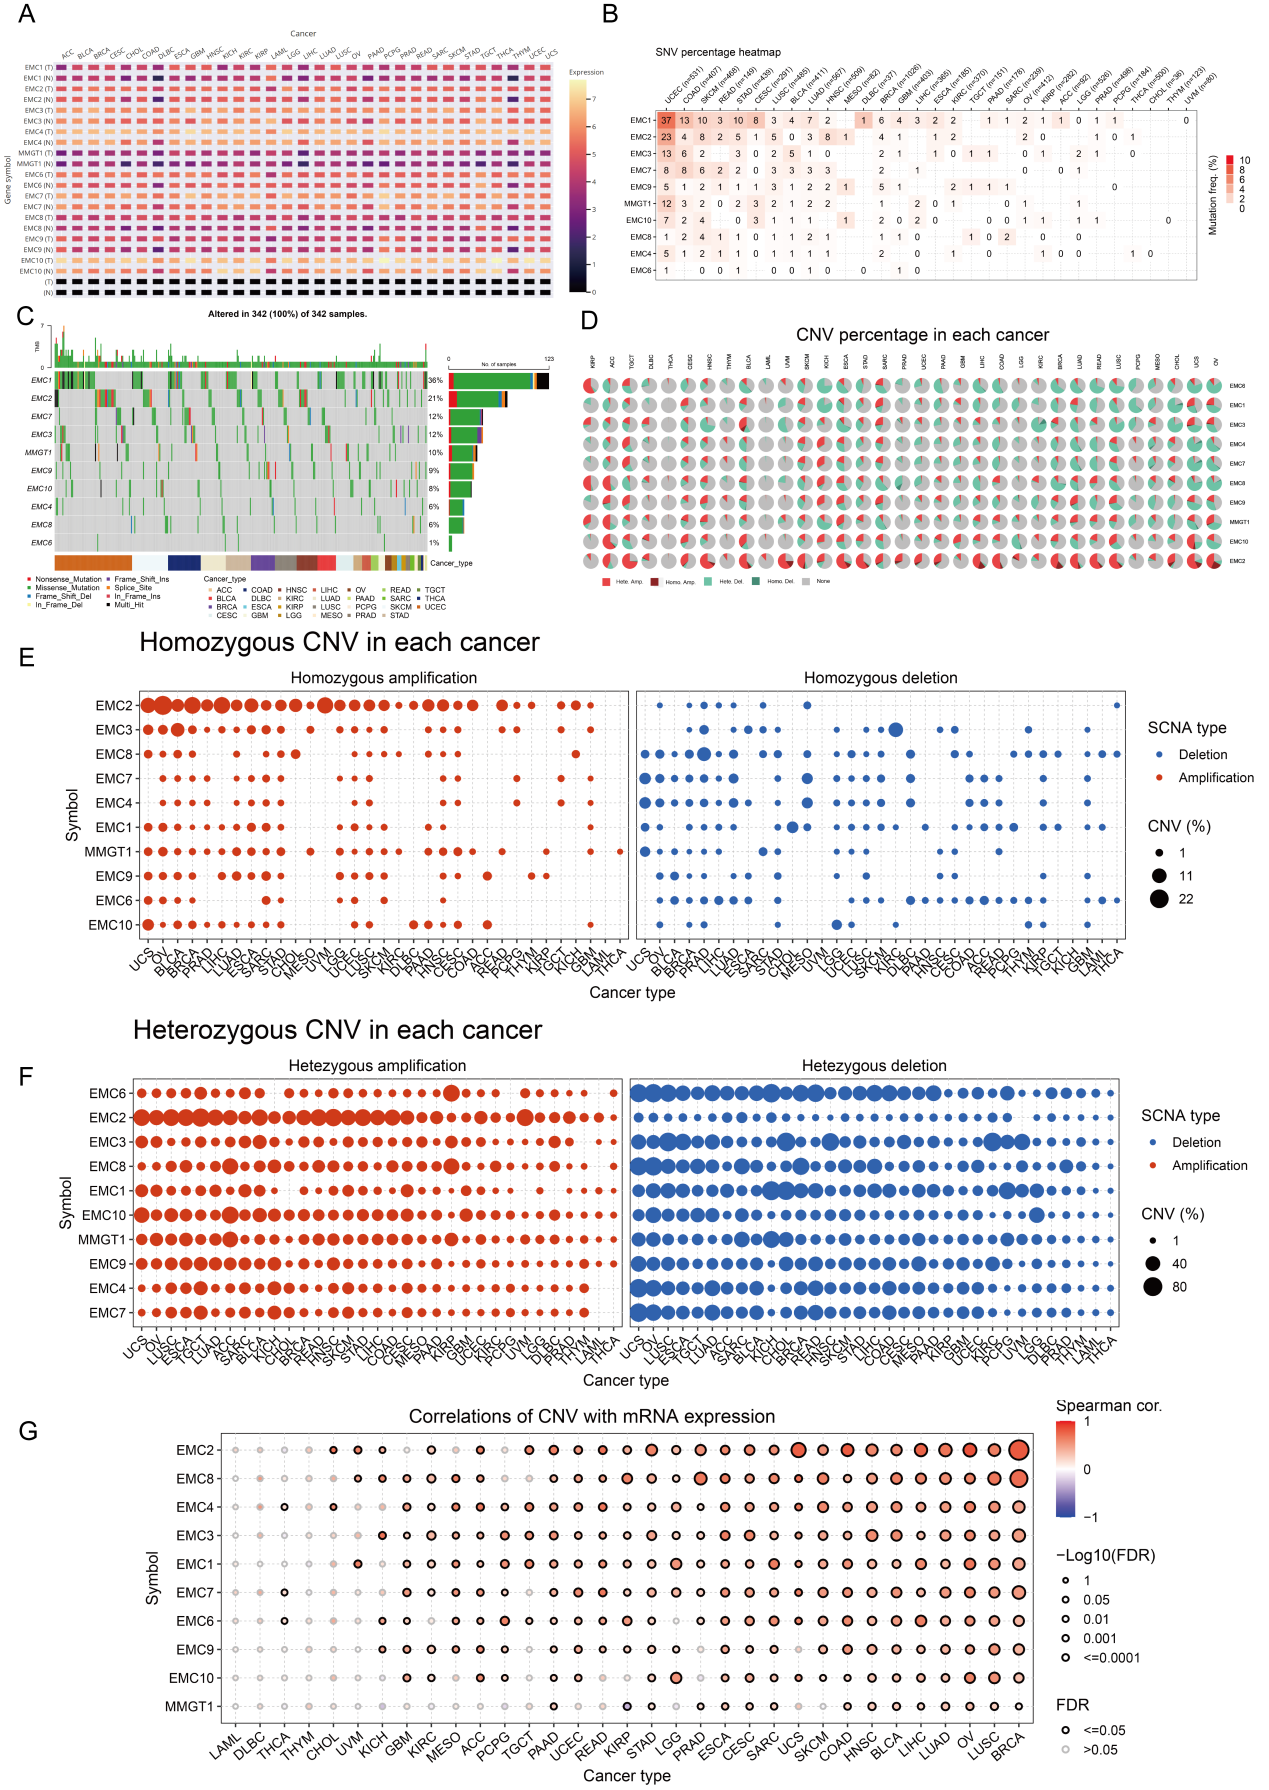


**Figure S1.** Abnormal patterns of the endoplasmic reticulum (ER) membrane protein complex (EMC) subunits expression in cancer.

(A) The transcript-level differences of EMC-related molecules between normal samples and cancer samples in TCGA. Normal tissues in both the TCGA and GTEx databases were included as negative controls.

(B) Mutation (single nucleotide variation, SNV) frequency of EMC-related molecules.

(C) The waterfall diagram displays the mutation type and summary of EMC-related molecules with the highest mutation frequency in TCGA pancancer.

(D) The pie chart illustrates the proportion of different types of copy number variaitons (CNVs) in each cancer.

(E) The amplification and deletion percentage of homozygous CNV about each gene in each cancer.

(F) The amplification and deletion percentage of heterozygous CNV about each gene in each cancer.

(G) The bubble plot shows the CNV associates with gene expression of EMC-related molecules.

## Figure S2


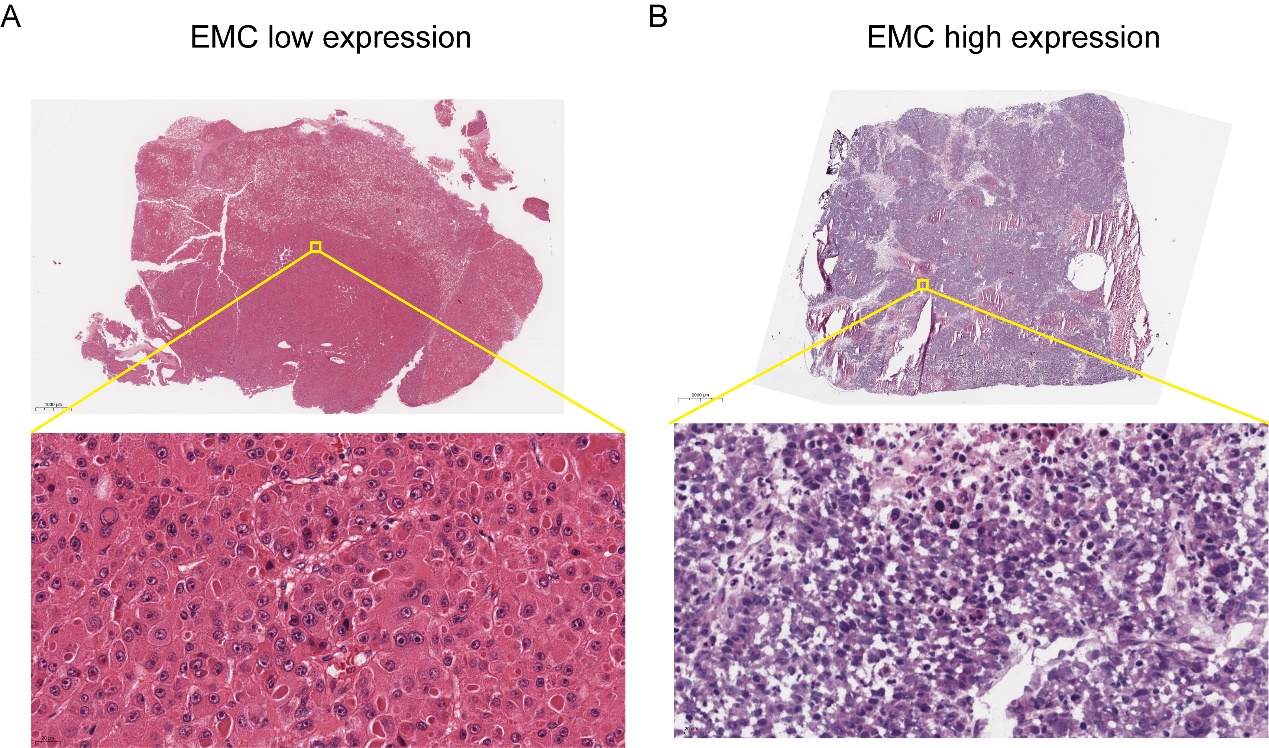


**Figure S2.** Representative Hematoxylin and eosin (HE) staining for high and low EMC expression levels in HCC tissues.

(A) HE staining for high-EMC HCC tissues.

(B) HE staining for low-EMC HCC tissues.

## Figure S3


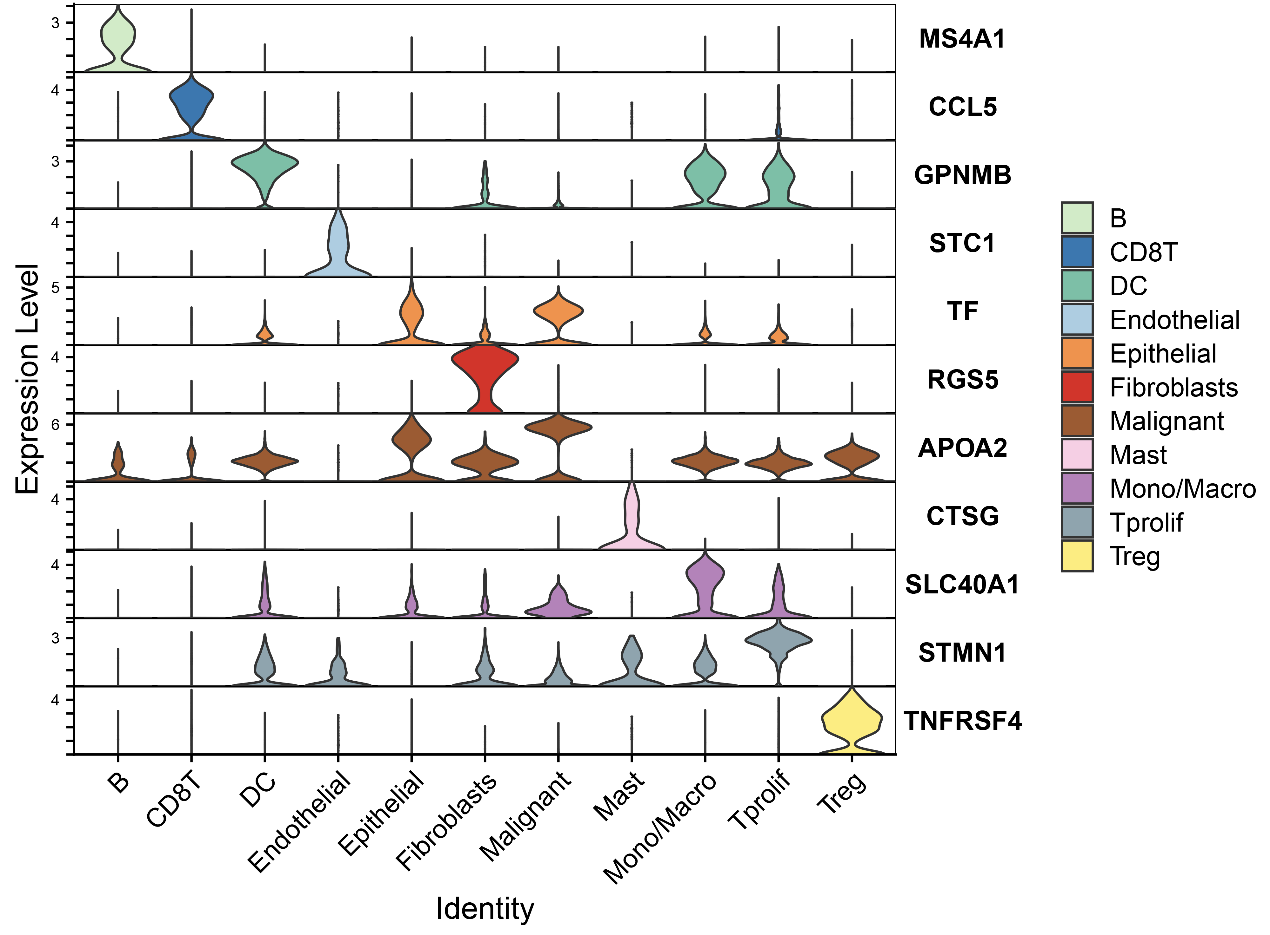


**Figure S3.** Violin plots showing the smoothed expression distribution of corresponding markers for different cell types.

## Figure S4


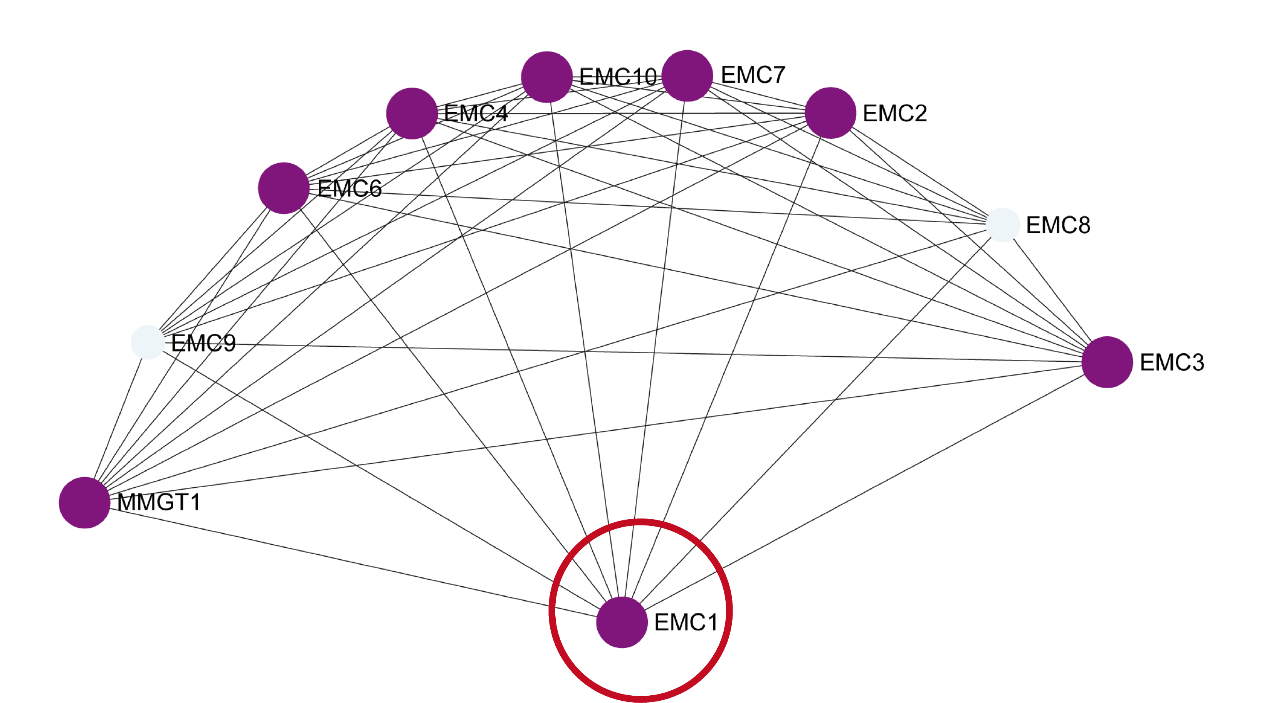


**Figure S4.** The protein–protein interaction (PPI) network of EMC based on the STRING database. EMC1 is highlighted with a red circle.

## Figure S5


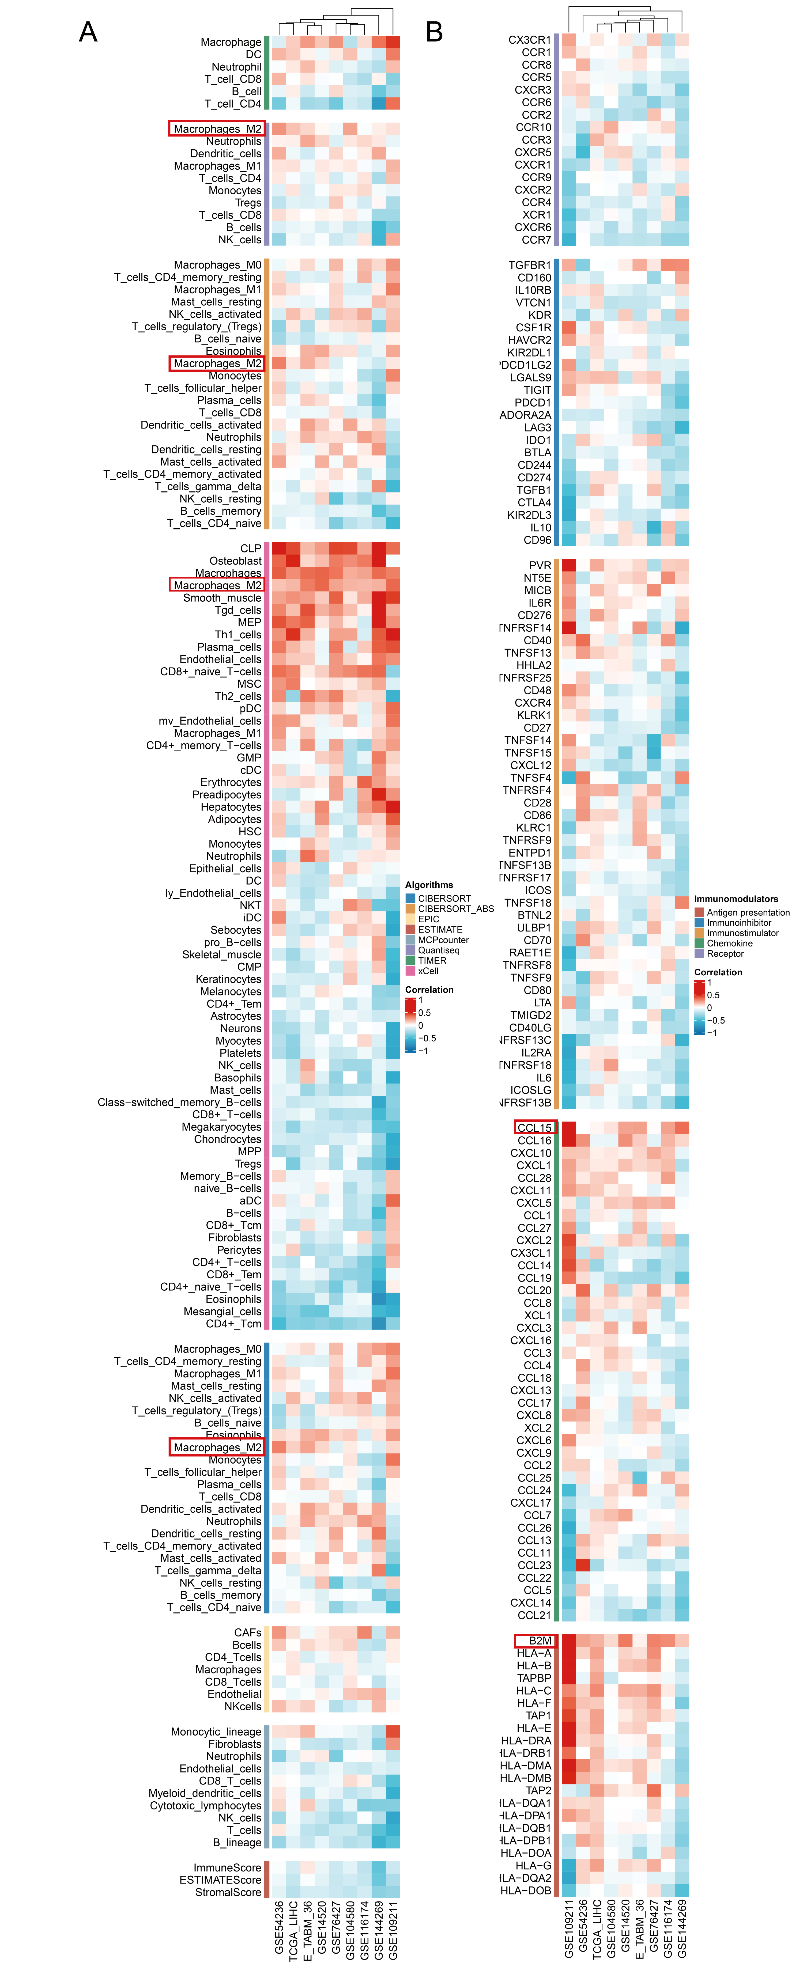


**Figure S5.** Correlation between EMC expression and immune cells as analyzed through BEST.

(A) The heatmap shows the correlation between EMC and immune cells estimated by eight algorithms. M2 macrophages are highlighted with red boxes.

(B) The heatmap shows the correlation between EMC and immune components. C-C Motif Chemokine Ligand 15 (*CCL15*) and Beta-2-Microglobulin (*B2M*) are highlighted with red boxes.

# Supplementary Tables

## Table S1

**Information on Antibodies and Reagents Used in This Study**

| Antibodies and Reagents | Manufacturer, Country, Cat number | Concentration |
| --- | --- | --- |
| HE staining kit | Beyotime Biotechnology, China, #C0105 | - |
| Plasmid vectors for *ECM1* | GeneChem, China, #10021850 | - |
| Puromycin | Beyotime Biotechnology, China, # 041321210517 | 1.5 μg/mL |
| 0.2% TritonX-100 | Proteintech, China, #61202011 | - |
| Nuclei were stained using 4',6-diamidino-2-phenylindole (DAPI) | Beyotime Biotechnology, China, #091620210520 | - |
| phorbol 12-myristate 13-acetate (PMA) | Sigma-Aldrich, USA, #63597-44-4 | 20 ng/mL |
| Bicinchoninic acid (BCA) Assay Kit | Vazyme, China, #E112-02 | 1.5 μg/mL |
|
| ATP Assay Kit | Beyotime Biotechnology, China, #S0026 | - |
| Penicillin/streptomycin | Gibco, USA, #15070063 | - |
| Protease and phosphatase inhibitor cocktail for genneraluse, 50X | Beyotime Biotechnology, China, #P1045 | - |
| Loading buffer | Epizyme, China, #LT103s | - |
| Radioimmunoprecipitation assay buffer (RIPA buffer) | Beyotime Biotechnology, China, #P0013B | - |
| anti-CD163 polyclonal antibodies | Proteintech, USA, #HPA046404 | IF: 1:500  IHC 1:500 |
| Anti-β-actin Mouse polyclonal antibodies | Proteintech, USA, #6609-1-Ig | WB 1:5000 |
| Aconitase 2 polyclonal antibodies | Peprotech, USA, #11134-1-AP | WB 1:5000 |
| OGDH polyclonal antibodies | Peprotech, USA, #15212-1-AP | WB 1:1000 |
| Beta Catenin polyclonal antibodies | Peprotech, USA, #51067-2-AP | WB 1:1000 |
| EMC1 polyclonal antibodies | Peprotech, USA, #26017-1-AP | WB 1:1000，IF: 1:300 |
| Anti-CK Rabbit polyclonal antibodies | Cell Signaling Technology, USA, #12509 | IF 1:200 |
| Goat Anti-Rabbit IgG H&L (HRP) | Abcam, UK, #ab205718 | IHC 1:2000 |
| Alexa Fluor 488 AffiniPure goat anti-mouse IgG (H+L) | FcMACS, China, #136908 | IF1:500 |
| Goat anti-mouse IgG (H+L) CoraLite594 | Proteintech, China, #SA00013-4 | IF 1:500 |
| Fluorescein (FITC) conjugated Affinipure Goat Anti-Rabbit IgG(H+L) | Proteintech, China, #SA00003-2 | IF 1:500 |
| Goat Anti-Rabbit IgG H&L (HRP) | Abcam, UK, #ab205718 | IHC 1:2000 |
| Highly Cross-Adsorbed Goat (Polyclonal) Anti-Mouse IgG(H+L) Antibody | LI-COR, USA, #926-68070 | WB 1:1000 |
| Highly Cross-Adsorbed Goat (Polyclonal) Anti-Rabbit IgG(H+L) Antibody | LI-COR, USA, #926-68071 | WB 1:1000 |
| Dulbecco’s modified Eagle’s medium (DMEM) | Gibco, USA, #11965092 | - |
| Fetal bovine serum (FBS) | Gibco, USA, #10091148 | - |
| Roswell Park Memorial Institute 1640 (RPMI-1640) | Gibco, USA, #11875119 | - |
| Recombinant Human FGF-basic (154 a.a.) | Peprotech, USA, #100-18B-100 | 20ng/ml |
| B27 supplement | Gibco, USA, #17504044 | 2% |
| Matrigel | Corning, USA, #356234 | - |
| D‐luciferin potassium salt | BLT, China, #LS003 | 15mg/ml |

Note: This table provides detailed information on the antibodies and reagents used in the study, including the manufacturer, country of origin, catalog number, and concentration used.

## Table S2

**Information of the lentivirus vector**

| Human | Lentivirus carrying sh-*EMC1* sequence: 5′-GCAGAGCGATTCATCAACTAT-3′ |
| --- | --- |
| negative control: 5′-TTCTCCGAACGTGCTCACGT-3′ |
| Mouse | Lentivirus carrying sh-*EMC1* sequence: 5′-TGGACCATAATAGCTACTCTGCAA-3′ |
| negative control: 5′-UUCUCCGAACGUGUCACGUTT-3′ |

Note: This table provides detailed information about the sequences used in the lentivirus vectors for both human and mouse studies, including the sh-EMC1 and negative control sequences.

## Table S3

**The clinicopathological characteristics of 80 HCC samples**

| Characteristics | (n = 80) | EMC1 low expression | EMC1 high expression | P-value |
| --- | --- | --- | --- | --- |
| Age (years) |  |  |  | 1 |
| ≥50 | 53 (66.25%) | 25 | 28 |
| <50 | 27 (33.75%) | 12 | 15 |
| Gender, n (%) |  |  |  | 0.404 |
| Female | 36 (45%) | 19 | 17 |
| Male | 44 (55%) | 18 | 26 |
| Histologic grade |  |  |  | 0.547 |
| G1 | 7 (8.75%) | 5 | 2 |
| G2 | 25 (31.25%) | 11 | 14 |
| G3 | 29 (36.25%) | 12 | 17 |
| G4 | 19 (23.75%) | 9 | 10 |
| TNM stage |  |  |  | 0.034 |
| I-II | 13 (31.25%) | 10 | 3 |
| III-IV | 67 (68.75%) | 27 | 40 |
| Differentiated degree |  |  |  | 0.137 |
| Low | 17 (21.25%) | 6 | 11 |
| Moderate | 43 (53.75%) | 18 | 25 |
| High | 20 (25%) | 13 | 7 |

Note: The P-value results indicate that there is a significant difference in the TNM Stage distribution between the EMC1 low expression and high expression groups (P = 0.034). For other characteristics, there are no significant differences between the groups (P-values are greater than 0.05).

## Table S4

**The clinicopathological characteristics of 20 HCC cases**

| Characteristics | (n = 20) | EMC1 low expression | EMC1 high expression | P-value |
| --- | --- | --- | --- | --- |
| Age (years) |  |  |  | 0.626 |
| ≥50 | 14 | 8 | 6 |
| <50 | 6 | 2 | 4 |
| Gender, n (%) |  |  |  | 0.648 |
| Female | 8 (40%) | 3 | 5 |
| Male | 12 (60%) | 7 | 5 |
| Histologic grade |  |  |  | 0.799 |
| G1 | 2 (10%) | 1 | 1 |
| G2 | 7 (35%) | 3 | 4 |
| G3 | 6 (30%) | 4 | 2 |
| G4 | 5 (25%) | 2 | 3 |
| TNM stage |  |  |  | 0.576 |
| III | 4 (30%) | 3 | 1 |
| IV | 16 (70%) | 7 | 9 |
| Differentiated degree |  |  |  | 0.648 |
| Low | 3 (15%) | 1 | 2 |
| Moderate | 12 (60%) | 7 | 5 |
| High | 5 (25%) | 2 | 3 |

Note: P-values calculated using the chi-square test, assessing the significance of differences between EMC1 low expression and high expression groups for each characteristic. There are no significant differences between the EMC1 low expression and high expression groups for all characteristics (all P-values are greater than 0.05).

## Table S5

**Details of Genes Related to EMC Complex**

| Gene symbol | Approved name | Previous symbols | Aliases | Chromosome |
| --- | --- | --- | --- | --- |
| EMC1 | ER membrane protein complex subunit 1 | KIAA0090 |  | 1p36.13 |
| EMC2 | ER membrane protein complex subunit 2 | KIAA0103,TTC35 |  | 8q23.1 |
| EMC3 | ER membrane protein complex subunit 3 | TMEM111 |  | 3p25.3 |
| EMC4 | ER membrane protein complex subunit 4 | TMEM85 | FLJ90746,MGC24415,PIG17 | 15q14 |
| MMGT1 | membrane magnesium transporter 1 | TMEM32 | EMC5 | Xq26.3 |
| EMC6 | ER membrane protein complex subunit 6 | TMEM93 | MGC2963,RAB5IFL | 17p13.2 |
| EMC7 | ER membrane protein complex subunit 7 | C15orf24 | C11orf3 | 15q14 |
| EMC8 | ER membrane protein complex subunit 8 | C16orf4,NOC4,C16orf2,COX4NB | FAM158B | 16q24.1 |
| EMC9 | ER membrane protein complex subunit 9 | C14orf122,FAM158A | CGI-112 | 14q12 |
| EMC10 | ER membrane protein complex subunit 10 | C19orf63 | INM02,HSS1,HSM1 | 19q13.33 |

Note: This table provides detailed information on the genes associated with the EMC complex, including their approved names, previous symbols, aliases, and chromosomal locations.

## Table S6

**Top 50 Differentially Expressed Genes in Malignant Cell Subgroup C1**

| Gene | p_val | avg_log2FC | pct.1 | pct.2 | p_val_adj | cluster |
| --- | --- | --- | --- | --- | --- | --- |
| APOA2 | 0 | 2.219256149 | 1 | 0.194 | 0 | Malignant C1 |
| ALB | 0 | 2.171745057 | 1 | 0.205 | 0 | Malignant C1 |
| APOA1 | 0 | 2.126910284 | 1 | 0.2 | 0 | Malignant C1 |
| FABP1 | 0 | 2.121865792 | 0.997 | 0.192 | 0 | Malignant C1 |
| APOE | 0 | 2.119066159 | 1 | 0.206 | 0 | Malignant C1 |
| AHSG | 0 | 2.09606041 | 0.992 | 0.2 | 0 | Malignant C1 |
| VTN | 0 | 2.051045404 | 0.999 | 0.2 | 0 | Malignant C1 |
| AFP | 0 | 2.036846333 | 0.996 | 0.202 | 0 | Malignant C1 |
| TF | 0 | 2.0323747 | 0.999 | 0.196 | 0 | Malignant C1 |
| AMBP | 0 | 2.020974698 | 1 | 0.213 | 0 | Malignant C1 |
| AGT | 0 | 2.004672117 | 0.999 | 0.2 | 0 | Malignant C1 |
| RBP4 | 0 | 2.004519534 | 1 | 0.196 | 0 | Malignant C1 |
| TTR | 0 | 2.001838605 | 0.999 | 0.23 | 0 | Malignant C1 |
| NTS | 0 | 1.984627953 | 0.993 | 0.191 | 0 | Malignant C1 |
| APOM | 0 | 1.974586249 | 0.998 | 0.303 | 0 | Malignant C1 |
| APOB | 0 | 1.948025807 | 0.997 | 0.196 | 0 | Malignant C1 |
| APOH | 0 | 1.928740433 | 0.998 | 0.199 | 0 | Malignant C1 |
| AKR1C4 | 0 | 1.911514931 | 0.998 | 0.196 | 0 | Malignant C1 |
| APOC1 | 0 | 1.88824775 | 1 | 0.458 | 0 | Malignant C1 |
| GAGE2A | 0 | 1.870882123 | 0.997 | 0.191 | 0 | Malignant C1 |
| AKR1C1 | 0 | 1.865187323 | 1 | 0.38 | 0 | Malignant C1 |
| GPC3 | 0 | 1.844738327 | 0.999 | 0.237 | 0 | Malignant C1 |
| APOC3 | 0 | 1.841012746 | 0.941 | 0.18 | 0 | Malignant C1 |
| ANGPTL8 | 0 | 1.823987195 | 0.968 | 0.187 | 0 | Malignant C1 |
| FGB | 0 | 1.811314423 | 0.995 | 0.192 | 0 | Malignant C1 |
| NPW | 0 | 1.81050406 | 0.992 | 0.205 | 0 | Malignant C1 |
| F2 | 0 | 1.792848197 | 0.995 | 0.191 | 0 | Malignant C1 |
| S100A9 | 0 | 1.770182707 | 0.979 | 0.238 | 0 | Malignant C1 |
| FGL1 | 0 | 1.770098475 | 0.993 | 0.198 | 0 | Malignant C1 |
| PRAP1 | 0 | 1.767883471 | 0.997 | 0.248 | 0 | Malignant C1 |
| BCHE | 0 | 1.754362842 | 0.993 | 0.191 | 0 | Malignant C1 |
| GC | 0 | 1.752257973 | 0.998 | 0.201 | 0 | Malignant C1 |
| FGG | 0 | 1.738304542 | 0.995 | 0.193 | 0 | Malignant C1 |
| ASGR1 | 0 | 1.732841268 | 0.99 | 0.195 | 0 | Malignant C1 |
| ORM1 | 0 | 1.730211481 | 0.978 | 0.187 | 0 | Malignant C1 |
| LBP | 0 | 1.714016617 | 0.994 | 0.191 | 0 | Malignant C1 |
| C2 | 0 | 1.684821164 | 0.992 | 0.231 | 0 | Malignant C1 |
| SERPINF1 | 0 | 1.684759613 | 0.992 | 0.199 | 0 | Malignant C1 |
| A1BG | 0 | 1.654201511 | 0.97 | 0.202 | 0 | Malignant C1 |
| FGA | 0 | 1.65324932 | 0.986 | 0.194 | 0 | Malignant C1 |
| ORM2 | 0 | 1.61025072 | 0.972 | 0.186 | 0 | Malignant C1 |
| ANGPTL3 | 0 | 1.61009129 | 0.985 | 0.188 | 0 | Malignant C1 |
| FXYD2 | 0 | 1.608238568 | 0.988 | 0.209 | 0 | Malignant C1 |
| SEPP1 | 0 | 1.587494576 | 0.998 | 0.545 | 0 | Malignant C1 |
| RARRES2 | 0 | 1.587422391 | 0.997 | 0.495 | 0 | Malignant C1 |
| HPX | 0 | 1.577875431 | 0.988 | 0.193 | 0 | Malignant C1 |
| SPP1 | 0 | 1.572912921 | 0.997 | 0.215 | 0 | Malignant C1 |
| TMEM176A | 0 | 1.569868301 | 0.995 | 0.38 | 0 | Malignant C1 |
| PLG | 0 | 1.562666586 | 0.985 | 0.186 | 0 | Malignant C1 |
| GPX3 | 0 | 1.534902828 | 0.978 | 0.24 | 0 | Malignant C1 |

Note: This table lists the top 50 differentially expressed genes in malignant cell subgroup C1, including their p-values, average log2 fold changes (avg_log2FC), percentage of cells in which the gene is detected in each subgroup (pct.1 and pct.2), adjusted p-values (p_val_adj), and the identified cluster. The information provided helps to elucidate the molecular characteristics and potential functional roles of these genes within the malignant C1 population.
